# Supplementary material for: Mg2Pb2Si2O7F2: a new lead-containing alkali earth metal silicate fluoride with a short cutoff edge
Source: Royal Society of Chemistry journal article supplement (doi:10.1039/d3nj03141a), 2023-01-01
Supplement: d3nj03141a1.pdf [file d3nj03141a1.pdf]

## Supplementary Information

### **Mg<sub>2</sub>Pb<sub>2</sub>Si<sub>2</sub>O<sub>7</sub>F<sub>2</sub>: A new lead-containing alkali earth metal silicate fluoride with a short cutoff edge**

Zhiyuan Zhang,<sup>a</sup> Lihan Deng,<sup>b</sup> Die Xu,<sup>a</sup> Mei Hu,<sup>c</sup> Zhencheng Wu,<sup>a</sup> Xin Su<sup>\*a</sup> and Yineng Huang<sup>\*a</sup>

*[a] Xinjiang Laboratory of Phase Transitions and Microstructures in Condensed Matter Physics, College of Physical Science and Technology, Yili Normal University, Yining, Xinjiang, 835000, China.*

*[b] School of Physics and Materials Science, Changji University, Changji 831100, China.*

*[c] Xinjiang Key Laboratory of Solid State Physics and Devices, School of Physical Science and Technology & School of Chemical Engineering and Technology, Xinjiang University, 777 Huarui Street, Urumqi 830017, China.*

\*Corresponding author: Xin Su

E-mail: [suxin\\_phy@sina.com](mailto:suxin_phy@sina.com)

Yineng Huang

E-mail: [ynhuang@nju.edu.cn](mailto:ynhuang@nju.edu.cn)

## Reagents

CCDC number: 2255929

Table S1. Crystal data and structure refinement for MPSOF.

Table S2. Atomic coordinate, equivalent isotropic displacement parameters ( $\text{\AA}^2 \times 10^3$ ) and bond valence sums (BVS) for MPSOF.

Table S3. Bond lengths [ $\text{\AA}$ ] and angles [ $^\circ$ ] for MPSOF.

Table S4. Cations containing alkali metal, alkaline earth metal and lone pair metal cations silicate fluorides.

Figure S1. EDS spectrum of MPSOF.

Figure S2. The coordination of cations for MPSOF: (a) the  $\text{Si}_2\text{O}_7$  dimer; (b) the  $\text{PbO}_3\text{F}$  tetrahedron; (c) the  $\text{Mg}(1)\text{O}_4\text{F}_2$  octahedron; (d) the  $\text{Mg}(2)\text{O}_4\text{F}_2$  octahedron.

Figure S3. The Si-O structures of different dimensions in 53 compounds.

Figure S4. The IR spectrum for MPSOF.

Figure S5. Powder XRD patterns at 950  $^\circ\text{C}$  for MPSOF.

Figure S6. The birefringence curves of MPSOF.

## References

**Table S1.** Crystal data and structure refinement for MPSOF.

| Empirical formula                                                | MPSOF                              |
|------------------------------------------------------------------|------------------------------------|
| Formula weight                                                   | 669.18                             |
| Temperature                                                      | 298.0 K                            |
| Wavelength                                                       | 0.71073 Å                          |
| Crystal system                                                   | Orthorhombic                       |
| Space group                                                      | <i>Pbcn</i>                        |
| Unit cell dimensions                                             | $a = 7.0395(2)$ Å                  |
|                                                                  | $b = 10.9134(4)$ Å                 |
|                                                                  | $c = 10.0979(4)$ Å                 |
| Volume                                                           | $775.77(5)$ Å <sup>3</sup>         |
| Z                                                                | 4                                  |
| Density (calculated)                                             | 5.730 Mg/m <sup>3</sup>            |
| Absorption coefficient                                           | 43.869 mm <sup>-1</sup>            |
| <i>F</i> (000)                                                   | 1160                               |
| Crystal size                                                     | 0.17 × 0.16 × 0.15 mm <sup>3</sup> |
| Theta range for data collection                                  | 3.444 to 27.511°                   |
| Index ranges                                                     | $-9 \leq h \leq 9,$                |
|                                                                  | $-14 \leq k \leq 14,$              |
|                                                                  | $-13 \leq l \leq 13$               |
| Reflections collected                                            | 10642                              |
| Independent reflections                                          | 897 [ $R_{int} = 0.0671$ ]         |
| Completeness to theta = 27.511°                                  | 100.0 %                            |
| Max. and min. transmission                                       | 0.2038 and 0.0696                  |
| Refinement method                                                | Full-matrix least-squares on $F^2$ |
| Data / restraints / parameters                                   | 897 / 0 / 69                       |
| Goodness-of-fit on $F^2$                                         | 1.158                              |
| Final <i>R</i> indices [ $F_o^2 > 2\sigma(F_o^2)$ ] <sup>a</sup> | $R_1 = 0.0218, wR_2 = 0.0494$      |
| <i>R</i> indices (all data) <sup>a</sup>                         | $R_1 = 0.0238, wR_2 = 0.0509$      |
| Extinction coefficient                                           | 0.00253(19)                        |
| Largest diff. peak and hole                                      | 1.649 and -1.365 e Å <sup>-3</sup> |

<sup>a</sup> $R_1 = \sum ||F_o| - |F_c|| / \sum |F_o|$  and  $wR_2 = [\sum w (F_o^2 - F_c^2)^2 / \sum w F_o^4]^{1/2}$  for  $F_o^2 > 2\sigma(F_o^2)$

**Table S2.** Atomic coordinates, equivalent isotropic displacement parameters ( $\text{\AA}^2 \times 10^3$ ) and bond valence sums (BVS) for MPSOF.

| Atom  | x         | y         | z         | U(eq) | BVS   |
|-------|-----------|-----------|-----------|-------|-------|
| Pb(1) | 0.5884(1) | 0.8325(1) | 0.5599(1) | 11(1) | 1.857 |
| Mg(1) | 0.5000    | 0.5000    | 0.5000    | 9(1)  | 2.119 |
| Mg(2) | 0.5000    | 0.3495(2) | 0.7500    | 9(1)  | 2.030 |
| Si(1) | 0.7821(2) | 0.5887(1) | 0.7478(2) | 7(1)  | 3.934 |
| O(1)  | 0         | 0.5318(5) | 0.7500    | 12(1) | 2.010 |
| O(2)  | 0.8038(6) | 0.7218(4) | 0.6771(4) | 11(1) | 1.846 |
| O(3)  | 0.7030(6) | 0.6048(4) | 0.8984(4) | 12(1) | 1.982 |
| O(4)  | 0.6681(6) | 0.4862(4) | 0.6644(4) | 10(1) | 1.924 |
| F(1)  | 0.3796(5) | 0.3507(3) | 0.5728(3) | 10(1) | 1.027 |

**Table S3.** Bond lengths [Å] and angles [°] for MP5OF.

|                     |            |                        |            |
|---------------------|------------|------------------------|------------|
| Pb(1)-F(1)#3        | 2.417(4)   | O(4)-Mg(2)-O(2)#8      | 87.50(16)  |
| Pb(1)-O(4)#4        | 2.620(4)   | O(4)#6-Mg(2)-O(2)#8    | 173.00(18) |
| Pb(1)-O(3)#5        | 2.299(4)   | O(2)#7-Mg(2)-O(2)#8    | 96.6(3)    |
| Pb(1)-O(2)          | 2.271(4)   | F(1)#3-Mg(1)-F(1)      | 180        |
| Si(1)-O(4)          | 1.613(4)   | F(1)-Mg(1)-O(4)        | 83.46(15)  |
| Si(1)-O(1)          | 1.655(3)   | F(1)#3-Mg(1)-O(4)#3    | 83.46(15)  |
| Si(1)-O(3)          | 1.629(5)   | F(1)#3-Mg(1)-O(4)      | 96.54(15)  |
| Si(1)-O(2)          | 1.626(4)   | F(1)-Mg(1)-O(4)#3      | 96.55(15)  |
| Mg(2)-F(1)          | 1.980(3)   | F(1)-Mg(1)-O(3)#9      | 91.42(17)  |
| Mg(2)-F(1)#6        | 1.980(3)   | F(1)#3-Mg(1)-O(3)#6    | 91.42(17)  |
| Mg(2)-O(4)#6        | 2.092(5)   | F(1)-Mg(1)-O(3)#6      | 88.58(17)  |
| Mg(2)-O(4)          | 2.092(5)   | F(1)#3-Mg(1)-O(3)#9    | 88.58(17)  |
| Mg(2)-O(2)#7        | 2.095(4)   | O(4)#3-Mg(1)-O(4)      | 180        |
| Mg(2)-O(2)#8        | 2.095(4)   | O(4)-Mg(1)-O(3)#9      | 87.88(17)  |
| Mg(1)-F(1)#3        | 1.979(4)   | O(4)-Mg(1)-O(3)#6      | 92.12(17)  |
| Mg(1)-F(1)          | 1.979(4)   | O(4)#3-Mg(1)-O(3)#9    | 92.13(17)  |
| Mg(1)-O(4)#3        | 2.045(4)   | O(4)#3-Mg(1)-O(3)#6    | 87.87(17)  |
| Mg(1)-O(4)          | 2.045(4)   | O(3)#6-Mg(1)-O(3)#9    | 180        |
| Mg(1)-O(3)#6        | 2.098(4)   | Mg(2)-F(1)-Pb(1)#3     | 117.10(18) |
| Mg(1)-O(3)#9        | 2.098(4)   | Mg(1)#3-F(1)-Pb(1)#3   | 115.80(16) |
|                     |            | Mg(1)-F(1)-Pb(1)#3     | 115.80(16) |
| F(1)#3-Pb(1)-O(4)#4 | 133.78(13) | Mg(1)-F(1)-Mg(2)       | 99.06(17)  |
| O(3)#5-Pb(1)-F(1)#3 | 78.08(14)  | Mg(1)#3-F(1)-Mg(2)     | 99.06(17)  |
| O(3)#5-Pb(1)-O(4)#4 | 71.18(14)  | Mg(1)#3-F(1)-Mg(1)     | 0          |
| O(2)-Pb(1)-F(1)#3   | 77.69(14)  | Si(1)-O(4)-Pb(1)#8     | 109.2(2)   |
| O(2)-Pb(1)-O(4)#4   | 72.18(14)  | Si(1)-O(4)-Mg(2)       | 124.1(2)   |
| O(2)-Pb(1)-O(3)#5   | 95.84(16)  | Si(1)-O(4)-Mg(1)       | 131.4(2)   |
| O(4)-Si(1)-O(1)     | 102.0(2)   | Si(1)-O(4)-Mg(1)#3     | 131.4(2)   |
| O(4)-Si(1)-O(3)     | 113.0(2)   | Mg(2)-O(4)-Pb(1)#8     | 94.56(16)  |
| O(4)-Si(1)-O(2)     | 115.9(2)   | Mg(1)-O(4)-Pb(1)#8     | 95.66(16)  |
| O(3)-Si(1)-O(1)     | 110.16(18) | Mg(1)#3-O(4)-Pb(1)#8   | 95.66(16)  |
| O(2)-Si(1)-O(1)     | 104.7(2)   | Mg(1)-O(4)-Mg(2)       | 93.46(16)  |
| O(2)-Si(1)-O(3)     | 110.2(2)   | Mg(1)#3-O(4)-Mg(2)     | 93.46(16)  |
| F(1)-Mg(2)-F(1)#6   | 179.2(3)   | Mg(1)#3-O(4)-Mg(1)     | 0          |
| F(1)#6-Mg(2)-O(4)#6 | 82.20(16)  | Si(1)#11-O(1)-Si(1)    | 135.9(4)   |
| F(1)-Mg(2)-O(4)#6   | 97.26(17)  | Si(1)-O(3)-Pb(1)#12    | 118.4(2)   |
| F(1)#6-Mg(2)-O(4)   | 97.26(17)  | Si(1)-O(3)-Mg(1)#13    | 129.1(3)   |
| F(1)-Mg(2)-O(4)     | 82.20(16)  | Si(1)-O(3)-Mg(1)#6     | 129.1(3)   |
| F(1)#6-Mg(2)-O(2)#8 | 92.26(17)  | Mg(1)#6-O(3)-Pb(1)#12  | 104.49(19) |
| F(1)-Mg(2)-O(2)#8   | 88.24(17)  | Mg(1)#13-O(3)-Pb(1)#12 | 104.49(19) |
| F(1)-Mg(2)-O(2)#7   | 92.26(17)  | Mg(1)#6-O(3)-Mg(1)#13  | 0          |
| F(1)#6-Mg(2)-O(2)#7 | 88.24(17)  | Si(1)-O(2)-Pb(1)       | 129.9(2)   |
| O(4)#6-Mg(2)-O(4)   | 89.0(3)    | Si(1)-O(2)-Mg(2)#1     | 120.1(2)   |

|                     |            |                    |            |
|---------------------|------------|--------------------|------------|
| O(4)#6-Mg(2)-O(2)#7 | 87.50(16)  | Mg(2)#1-O(2)-Pb(1) | 105.64(18) |
| O(4)-Mg(2)-O(2)#7   | 173.00(18) | O(4)-Mg(2)-O(2)#8  | 87.50(16)  |

---

Symmetry transformations used to generate equivalent atoms:

#1  $x+1/2, y+1/2, -z+3/2$     #2  $x+1/2, -y+3/2, -z+1$

#3  $-x+1, -y+1, -z+1$     #4  $-x+3/2, y+1/2, z$

#5  $-x+3/2, -y+3/2, z-1/2$     #6  $-x+1, y, -z+3/2$

#7  $x-1/2, y-1/2, -z+3/2$     #8  $-x+3/2, y-1/2, z$

#9  $x, -y+1, z-1/2$     #10  $x-1/2, -y+3/2, -z+1$

#11  $-x+2, y, -z+3/2$     #12  $-x+3/2, -y+3/2, z+1/2$

#13  $x, -y+1, z+1/2$

**Table S4.** Cations containing alkali metal, alkaline earth metal and lone pair metal cations silicate fluorides.

| No. | Compounds                                                                   | Space group                                     | Anionic groups                                                                   | M/Si  |
|-----|-----------------------------------------------------------------------------|-------------------------------------------------|----------------------------------------------------------------------------------|-------|
| 1   | $Mg_{10}(Si_3O_{14})F_4^{1-2}$                                              | <i>Pnnm</i>                                     | SiO <sub>4</sub> tetrahedra                                                      | 3.33  |
| 2   | $Mg_3(SiO_4)F_2^3$                                                          | <i>Pnma</i>                                     | SiO <sub>4</sub> tetrahedra                                                      | 3     |
| 3   | $Mg_3(SiO_4)(F_{1.513}(OH)_{0.487})^4$                                      | <i>Pnma</i>                                     | SiO <sub>4</sub> tetrahedra                                                      | 3     |
| 4   | $Mg_3(SiO_4)(F_{1.537}(OH)_{0.463})^4$                                      | <i>Pnma</i>                                     | SiO <sub>4</sub> tetrahedra                                                      | 3     |
| 5   | $Ca_{5.45}Li_{3.55}(SiO_4)_3O_{0.45}F_{1.5}^5$                              | $R\bar{3}m$                                     | SiO <sub>4</sub> tetrahedra                                                      | 3     |
| 6   | $LiSr_2(SiO_4)F^6$                                                          | <i>P2<sub>1</sub>/m</i>                         | SiO <sub>4</sub> tetrahedra                                                      | 3     |
| 7   | $Mg_3(SiO_4)F(OH)^7$                                                        | <i>Pnma</i>                                     | SiO <sub>4</sub> tetrahedra                                                      | 3     |
| 8   | $(Ca_{1.14}Na_{0.86})(Ca_{0.78}Na_{0.22})(SiO_4)F^8$                        | <i>Pnma</i>                                     | SiO <sub>4</sub> tetrahedra                                                      | 3     |
| 9   | $KCa_7(SiO_4)_3F_3^5$                                                       | <i>P31c</i>                                     | SiO <sub>4</sub> tetrahedra                                                      | 2.67  |
| 10  | $Li_2Be_3Ca_3Si_3O_{12}F_2^9$                                               | <i>I2<sub>1</sub>3</i>                          | SiO <sub>4</sub> tetrahedra                                                      | 2.6   |
| 11  | $Ca_5(SiO_4)_2F(OH)^{10}$                                                   | <i>P2<sub>1</sub>/c</i>                         | SiO <sub>4</sub> tetrahedra                                                      | 2.5   |
| 12  | $Mg_5(SiO_4)_2F_2^3$                                                        | <i>P2<sub>1</sub>/c</i>                         | SiO <sub>4</sub> tetrahedra                                                      | 2.5   |
| 13  | $Mg_5(SiO_4)_2(F_{1.1}(O\ D)_{0.9})^{11}$                                   | <i>P2<sub>1</sub>/c</i>                         | SiO <sub>4</sub> tetrahedra                                                      | 2.5   |
| 14  | $Ca_5(SiO_4)_2(F_{1.4}(OH)_{0.6})^{12}$                                     | <i>P2<sub>1</sub>/c</i>                         | SiO <sub>4</sub> tetrahedra                                                      | 2.5   |
| 15  | $Ca_5(SiO_4)_2(F_{0.6}(OH)_{1.4})^{12}$                                     | <i>P2<sub>1</sub>/c</i>                         | SiO <sub>4</sub> tetrahedra                                                      | 2.5   |
| 16  | $Ca_7(SiO_4)_3(F_{0.56}(OH)_{1.44})^{13}$                                   | <i>Pnma</i>                                     | SiO <sub>4</sub> tetrahedra                                                      | 2.333 |
| 17  | $Ca_7(SiO_4)_3(F_{0.5}(OH)_{1.5})^{13}$                                     | <i>Pnma</i>                                     | SiO <sub>4</sub> tetrahedra                                                      | 2.333 |
| 18  | $Ca_9(SiO_4)_4F_{0.784}(OH)_{1.2}^{14}$                                     | <i>P2<sub>1</sub>/c</i>                         | SiO <sub>4</sub> tetrahedra                                                      | 2.25  |
| 19  | $Ca_9(SiO_4)_4F_{0.96}(OH)_{1.04}^{14}$                                     | <i>P2<sub>1</sub>/c</i>                         | SiO <sub>4</sub> tetrahedra                                                      | 2.25  |
| 20  | $Ca_4(Si_2O_7)F_2^{15}$                                                     | <i>P2<sub>1</sub>/c</i>                         | Si <sub>2</sub> O <sub>7</sub> dimers                                            | 2     |
| 21  | $NaBa_3Si_2O_7F^{16}$                                                       | <i>Cmcm</i>                                     | Si <sub>2</sub> O <sub>7</sub> dimers                                            | 2     |
| 22  | $Mg_2Pb_2Si_2O_7F_2$ (this work)                                            | <i>Pbcn</i>                                     | Si <sub>2</sub> O <sub>7</sub> dimers                                            | 2     |
| 23  | $Ca_4Si_2O_7(F_{1.5}(OH)_{0.5})^{15}$                                       | <i>P2<sub>1</sub>/c</i>                         | Si <sub>2</sub> O <sub>7</sub> dimers                                            | 2     |
| 24  | $NaBeCa(Si_2O_6)F^{17,18}$                                                  | <i>P2<sub>1</sub>2<sub>1</sub>2<sub>1</sub></i> | Si <sub>2</sub> O <sub>6</sub> chains                                            | 1.5   |
| 25  | $Na_3SnSi_3O_9F^{19}$                                                       | <i>C2/m</i>                                     | Si <sub>6</sub> O <sub>18</sub> rings                                            | 1.333 |
| 26  | $Ca_{13}Si_{10}O_{28}F_{10}\cdot 6H_2O^{20,21}$                             | $R\bar{3}$                                      | Si <sub>5</sub> O <sub>14</sub> layers                                           | 1.3   |
| 27  | $K_{1.37}Ca_{6.90}(Si_8O_{22})F_{1.91}\cdot 0.264H_2O^{22}$                 | <i>P1</i>                                       | Si <sub>2</sub> O <sub>7</sub> dimers<br>Si <sub>12</sub> O <sub>30</sub> chains | 1.034 |
| 28  | $K(NaCa)Mg_5(Si_8O_{22})F_2^{23}$                                           | <i>C2/m</i>                                     | Si <sub>4</sub> O <sub>11</sub> chains                                           | 1     |
| 29  | $Na(NaCa)Mg_5Si_8O_{22}F_2^{23}$                                            | <i>C2/m</i>                                     | Si <sub>4</sub> O <sub>11</sub> chains                                           | 1     |
| 30  | $K(NaMg_2)(Si_4O_{10}F_2)^{24}$                                             | <i>C2/m</i>                                     | Si <sub>4</sub> O <sub>10</sub> layers                                           | 1     |
| 31  | $K_{1.37}Ca_{6.57}(Si_8O_{22})F_{1.97}\cdot 0.106(H_2O)^{22}$               | <i>P1</i>                                       | Si <sub>2</sub> O <sub>7</sub> dimers<br>Si <sub>12</sub> O <sub>30</sub> chains | 0.993 |
| 32  | $K_{0.967}(Mg_{0.708}Li_{0.292})(Mg_{0.663}Li_{0.337})_2Si_4O_{10}F_2^{25}$ | <i>C2/m</i>                                     | Si <sub>4</sub> O <sub>10</sub> layers                                           | 0.992 |
| 33  | $(Li_{0.76}Mg_{2.24})Na_{0.70}Si_4O_{10}F_2\cdot 4H_2O^{26}$                | <i>C2/m</i>                                     | Si <sub>4</sub> O <sub>10</sub> layers                                           | 0.925 |
| 34  | $(Li_{0.81}Mg_{2.19})Na_{0.70}Si_4O_{10}F_2\cdot 2.1H_2O^{26}$              | <i>C2/m</i>                                     | Si <sub>4</sub> O <sub>10</sub> layers                                           | 0.925 |
| 35  | $Ca_2Mg_5Si_8O_{22}F_2^{27}$                                                | <i>C2/m</i>                                     | Si <sub>4</sub> O <sub>11</sub> chains                                           | 0.875 |
| 36  | $Mg_7Si_8O_{22}F_2^{28}$                                                    | <i>Pnnm</i>                                     | Si <sub>4</sub> O <sub>11</sub> chains                                           | 0.875 |
| 37  | $K_{0.88}Mg_{2.5}Si_4O_{10}F_2^{29}$                                        | <i>C2/m</i>                                     | Si <sub>4</sub> O <sub>10</sub> layers                                           | 0.845 |
| 38  | $Na_{0.945}(Ca_{1.73}Sr_{0.15}Na_{0.12})(Si_4O_{10})F^{30}$                 | <i>P1</i>                                       | Si <sub>4</sub> O <sub>10</sub> chains                                           | 0.736 |

|    |                                                                                                      |            |                                                                                                                           |       |
|----|------------------------------------------------------------------------------------------------------|------------|---------------------------------------------------------------------------------------------------------------------------|-------|
| 39 | $(K_{13.16}Sr_{1.38})(Ca_{24}Na_{7.32})(Si_{70}O_{166.4}(OH)_{13.6})(F_2(OH)_2) \cdot 0.82H_2O^{31}$ | $P2_1/m$   | Si <sub>6</sub> O <sub>16</sub> chains Si <sub>12</sub> O <sub>30</sub> chains<br>Si <sub>17</sub> O <sub>43</sub> chains | 0.655 |
| 40 | $K_{2.438}Ca_{4.487}Na_{3.513}Si_{16}O_{38}F_2(H_2O)_{1.079}^{32}$                                   | $P\bar{1}$ | Si <sub>8</sub> O <sub>19</sub> layers                                                                                    | 0.652 |
| 41 | $K_{2.318}Ca_{4.694}Na_{3.310}Si_{16}O_{38}F_2(H_2O)_{0.516}^{32}$                                   | $P\bar{1}$ | Si <sub>8</sub> O <sub>19</sub> layers                                                                                    | 0.645 |
| 42 | $K_{0.84}Na_{0.16}Ca_4Si_8O_{20}F \cdot 8H_2O^{33}$                                                  | $P4/mnc$   | Si <sub>4</sub> O <sub>10</sub> layers                                                                                    | 0.625 |
| 43 | $KCa_4(Si_4O_{10})_2(F_{0.84}(OH)_{0.16}) \cdot 8H_2O^{34}$                                          | $P4/mnc$   | Si <sub>4</sub> O <sub>10</sub> layers                                                                                    | 0.625 |
| 44 | $KCa_4Si_8O_{20}F \cdot 8H_2O^{33-36}$                                                               | $P4/mnc$   | Si <sub>4</sub> O <sub>10</sub> layers                                                                                    | 0.625 |
| 45 | $Na_{0.16}K_{0.84}Ca_4Si_8O_{20}F \cdot 8H_2O^{37,38}$                                               | $P4/mnc$   | Si <sub>4</sub> O <sub>10</sub> layers                                                                                    | 0.625 |
| 46 | $KCa_4(Si_8O_{20})F \cdot 6.88H_2O^{37}$                                                             | $P4/mnc$   | Si <sub>4</sub> O <sub>10</sub> layers                                                                                    | 0.625 |
| 47 | $NaCa_4(Si_8O_{20})F \cdot 8H_2O^{39}$                                                               | $Pnmm$     | Si <sub>4</sub> O <sub>10</sub> layers                                                                                    | 0.625 |
| 48 | $(Na_{0.96}K_{0.04})_{0.97}Ca_4Si_8O_{20}F(H_2O)_8^{40}$                                             | $Pnmm$     | Si <sub>4</sub> O <sub>10</sub> layers                                                                                    | 0.625 |
| 49 | $K_{0.92}Ca_{3.92}Si_8O_{19.75}F_{0.97} \cdot 7.85H_2O^{41,42}$                                      | $P4/mnc$   | Si <sub>4</sub> O <sub>10</sub> layers                                                                                    | 0.605 |
| 50 | $K_{1.466}Ca_{4.903}Na_{3.179}Si_{16}O_{38}F_2(H_2O)_{2.561}^{32}$                                   | $P\bar{1}$ | Si <sub>8</sub> O <sub>19</sub> layers                                                                                    | 0.598 |
| 51 | $(K_{1.65}Na_{0.83})(Ca_{4.52}Na_{2.48})Si_{16}O_{38}(F(OH))H_2O^{41,42}$                            | $P\bar{1}$ | Si <sub>8</sub> O <sub>19</sub> layers                                                                                    | 0.593 |
| 52 | $(Na_{1.54}K_{0.80})(Ca_{4.03}Na_{2.97})Si_{16}O_{38}F_2 \cdot 3.69H_2O^{43}$                        | $P\bar{1}$ | Si <sub>8</sub> O <sub>19</sub> layers                                                                                    | 0.584 |
| 53 | $(Na_{1.29}K_{0.79})(Ca_{4.48}Na_{2.52})Si_{16}O_{38}F_2 \cdot 3.47H_2O^{43}$                        | $P\bar{1}$ | Si <sub>8</sub> O <sub>19</sub> layers                                                                                    | 0.568 |



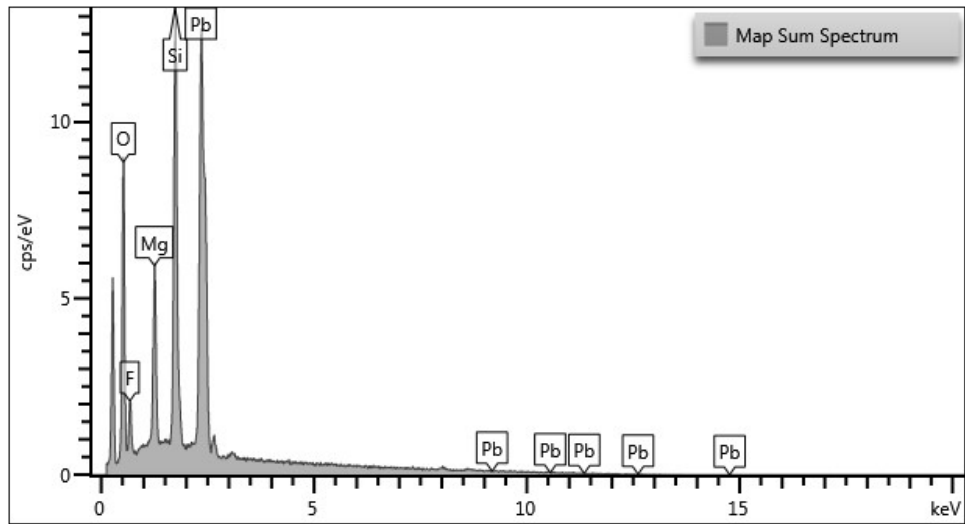

| Element | Wt%    | Wt% Sigma | Atomic % |
|---------|--------|-----------|----------|
| O       | 22.68  | 0.27      | 54.70    |
| F       | 4.77   | 0.20      | 9.69     |
| Mg      | 5.53   | 0.10      | 8.79     |
| Si      | 12.07  | 0.13      | 16.58    |
| Pb      | 54.95  | 0.35      | 10.24    |
| Total:  | 100.00 |           | 100.00   |

Figure S1. EDS spectrum of MPSOF.

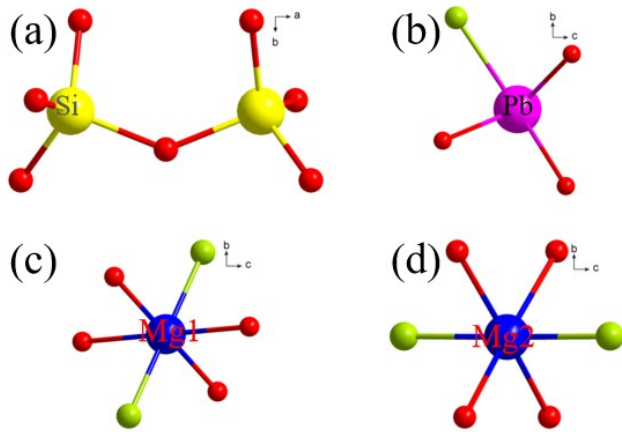

**Figure S2.** The coordination of cations for MPSOF: (a) the  $\text{Si}_2\text{O}$  dimer; (b) the  $\text{PbO}_3\text{F}$  tetrahedron; (c) the  $\text{Mg}(1)\text{O}_4\text{F}_2$  octahedron; (d) the  $\text{Mg}(2)\text{O}_4\text{F}_2$  octahedron.

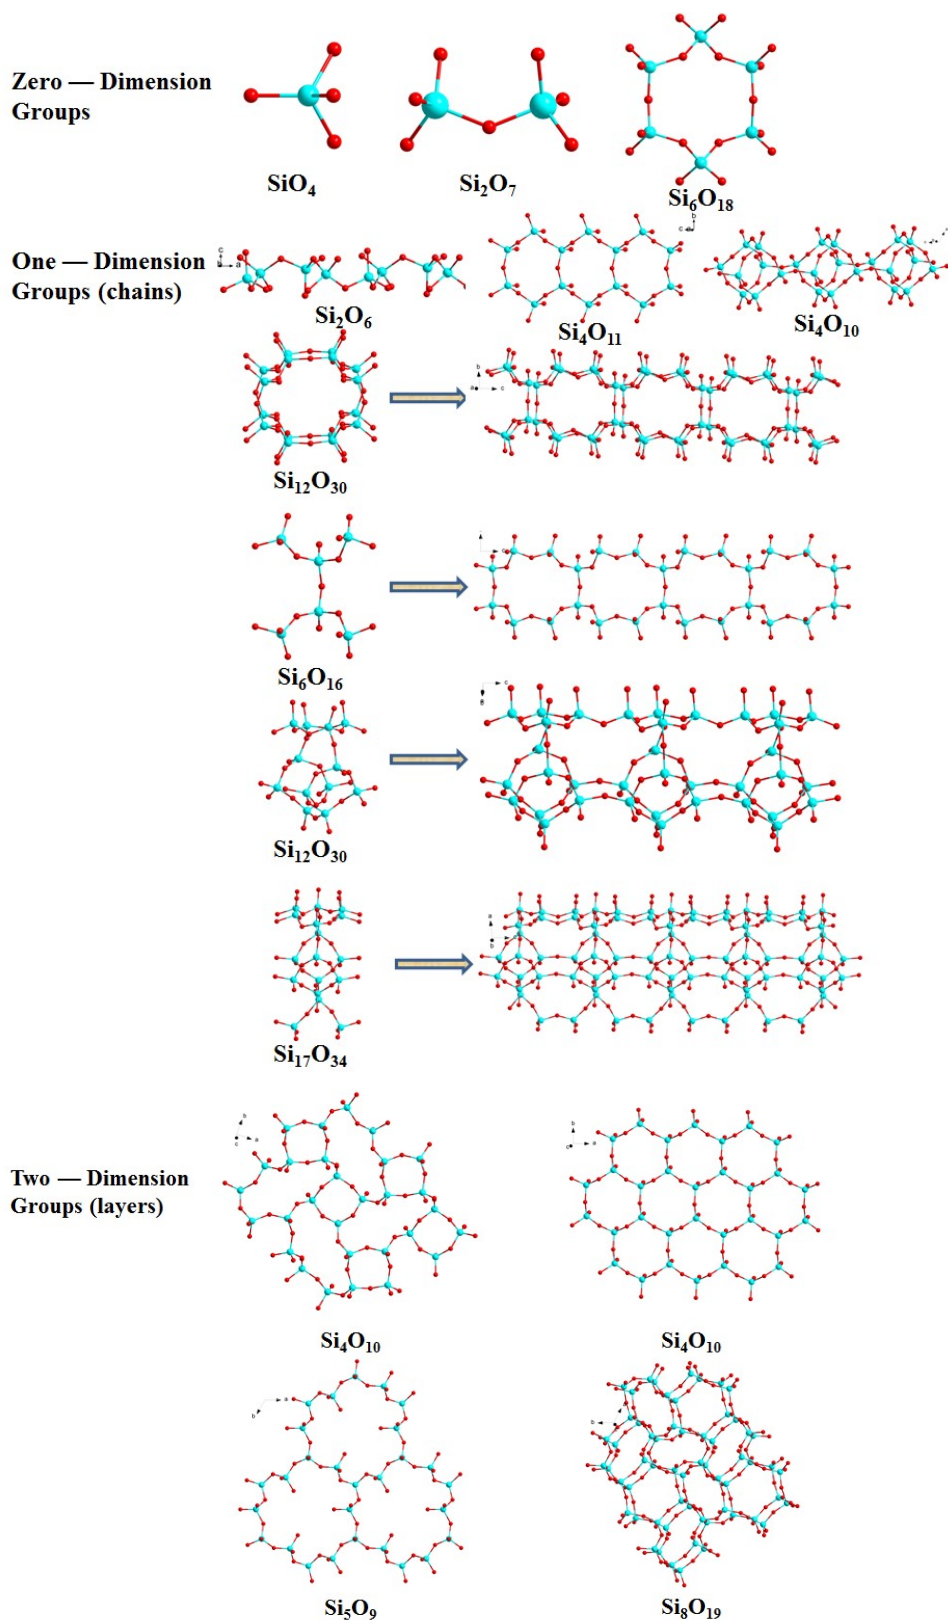

**Figure S3.** The Si-O structures of different dimensions in 53 compounds.

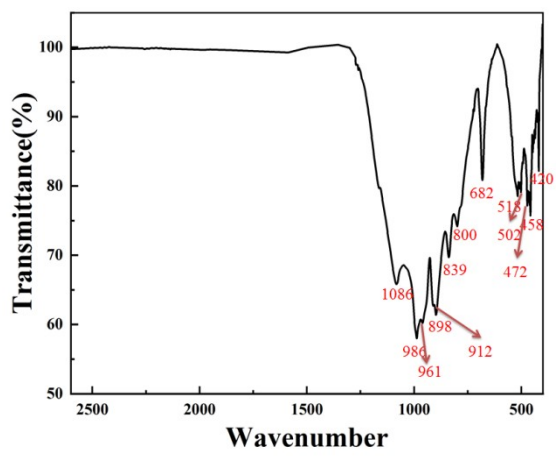

Figure S4. The IR spectrum for MPSOF.

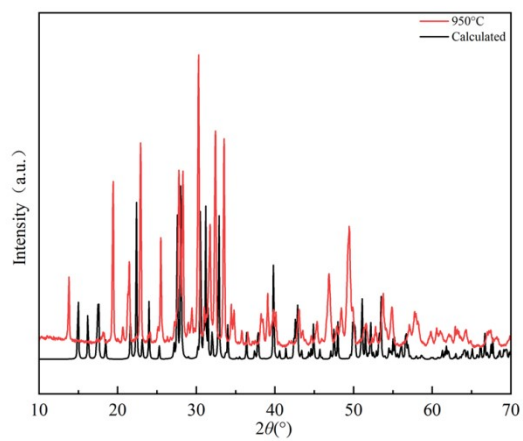

**Figure S5.** Powder XRD patterns at 950 °C for MPSOF.

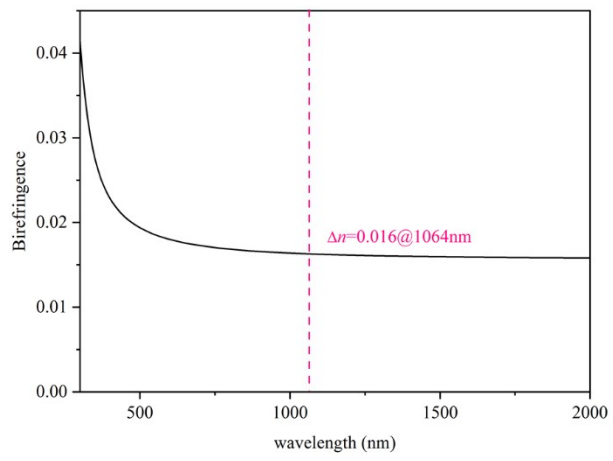

**Figure S6.** The birefringence curves of MPSOF.

## References

- 1 R. E. G. Pacal, J. B. Parise, *Am. Mineral.*, 1992, **77**, 681-684.
- 2 R. M. Hazen, H. X. Yang, C. T. Prewitt, T Gasparik, *Am. Mineral.*, 1997, **82**, 647-650.
- 3 N. Zhen, K. Wu, Q. Li, S. L Pan, W. H. Gao, Z. H. Yang, *New. J. Chem.*, 2015, **39**, 8866-8873.
- 4 F. Camara, *Can. Mineral.*, 1997, **35**, 1523-1530.
- 5 H Krüger, *Z. Kristallogr.*, 2010, **225**, 418-424.
- 6 A. Akella, D. A. Keszle, *Chem. Mater.*, 1995, **7**, 1299-1302.
- 7 W. H. Taylor, *J. West J. Proc. Roy. Soc. A*, 1928, **117**, 461-474.
- 8 O. Andac, F. P. Glasser, R. A. Howie, *Acta Crystallogr.*, 1997, **C53**, 831-833.
- 9 R. K. Rastsvetaeva, O. Y. Rekhlova, V. I. Andrianov, Y. A. Malinovskii, *Dokl. Akad. Nauk SSSR*, 1991, 316, 624-628.
- 10 A. Kirfel, H. M. Hamm, G. Will, *Tschernnaks Min. Petr. Mitt.*, 1983, **31**, 137-150.
- 11 A. Friedrich, G. A. Lager, P. Ulmer, M. Kunz., W. G. Marshall, *Am. Mineral.*, 2002, **87**, 931-939.
- 12 I. O. Galuskina, B. Lazic, T. Armbruster, E. V. Galuskin, V. M. Gazeev, A. E. Zadov, N. N. Pertsev, L. Ježak, R. Wrzalik, A. G. Gurbanov, *Am. Mineral.*, 2009, **94**, 1361-1370.
- 13 E. V. Galuskin, V. M. Gazeev, B. Lazic, T. Armbruster, I. O. Galuskina, A. E. Zadov, N. N. Pertsev, W. Wrzalik, P. Dzierżanowski, A. G. Gurbanov, G. Bzowska, *Eur. J. Mineral.*, 2009, **21**, 1045-1059.
- 14 E. V. Galuskin, B. Lazic, T. Armbruster, I. O. Galuskina, N. N. Pertsev, V. M. Gazeev, R. Włodyka, M. Dulski, P. Dzierżanowski, A. E. Zadov, L. S. Dubrovinsky, *Am. Mineral.*, 2012, **97**, 1998-2006.
- 15 S. Saburi, A. Kawahara, C. Henmi, *J. Mineral.*, 1977, **8**, 286-298.
- 16 Z. H. Miao, Y. Yang, Z. L. Wei, Z. H. Yang, S. L. Pan, *Sci. China Mater.*, 2019, **62**, 1454-1462.
- 17 J. D. Grice, F. C. Hawthorne, *Can. Mineral.*, 1989, **27**, 193-197.
- 18 E. Cannillo, G. Giuseppetti, V. Tazzoli, *Acta Crystallogr.*, 1967, **23**, 255-259.
- 19 C. H. Liao, P. C. Chang, H. M. Kao, K. H. Lii, *Inorg. Chem.*, 2005, **44**, 9335-9339.
- 20 W. Mikenda, F. Pertlik, P. Povondra, J. Ulrych, *Miner. Petrol.*, 1997, **61**, 199-209.
- 21 S. Merlino, *Acta Crystallogr.*, 1972, **B28**, 2726-2732.
- 22 E. Kaneva, M. Lacalamita, E. Mesto, E. Schingaro, F. Scordari, N. Vladykin, *Phys. Chem. Miner.*, 2013, **41**, 49-63.
- 23 M. Cameron, S. Sueno, J. J. Papike, C. T. Prewitt, *Am. Mineral.*, 1983, **68**, 924-943.
- 24 I. V. Pekov, N. V. Chukanov, G. Ferraris, G. Ivaldi, D. Y. Pushcharovsky, A. E. Zadov, *Eur. J. Mineral.*, 2003, **15**, 447-454.
- 25 H. Toraya, S. Iwai, F. Marcmo, *Z Kristallogr.*, 1977, **146**, 73-83.
- 26 H. Kalo, W. Milius, J. Breu, *Rsc. Adv.*, 2012, **2**, 8452.
- 27 E. Olsen, *Am. Mineral.*, 1973, **58**, 869-872.
- 28 S. Sueno, S. Matsuura, G. V. Gibbs, M. B. B. Jr, *Phys. Chem. Minerals.*, 1998, **25**, 366-377.
- 29 Toraya H, Iwai S, Marcmo F, R. Kondo, M. Daimon, *Z Kristallogr.*, 1976, **144**, 42-45.
- 30 I. V. Rozhdestvenskaya, L. V. Nikishova, *Crystallogr. Rep.*, 1998, **43**, 589-597.
- 31 I. V. Rozhdestvenskaya, E. Mugnaioli, M. Czank, W. Depmeier, U. Kolb, S. Merlino, *Mineral. Mag.*, 2018, **75**, 2833-2846.
- 32 E. V. Kaneva, R. Y. Shendrik, T. A. Radomskaya, L. F. Suvorova, *Minerals*, 2020, **10**, 702.
- 33 K. Stahl, A. Kvick, S. Ghose, *Acta Crystallogr.*, 1987, **B43**, 517-523.
- 34 H. Bartl, G. Pfeifer, *Neues. Jahrb. Mineral.*, 1976, **58**, 65.
- 35 G. Y. Chao, *Am. Mineral.*, 1971, **56**, 1234-1242.
- 36 W. H. Taylor, S. T. Naray-Szabo, *Z. Kristallogr.-Cryst. Mater.*, 1931, **77**, 146-158.
- 37 K. Stahl, *Eur. J. Mineral.*, 1993, 845-850.
- 38 A. A. Colville, C. P. Anderson, P. M. Black, *Am. Mineral.*, 1971, **56**, 1222-1233.
- 39 H. Matsueda, Y. Miura, J. Rucklidge, *Am. Mineral.*, 1981, **66**, 410-423.
- 40 G. Branoiu, D. Cursaru, S. Mihai, I Ramadan, *Rev. Chim.-Bucharest.*, 2019, **70**, 4248-4254.
- 41 G. V. Sokolova, A. A. Kashayev, V. A. Drits, *Kristallogr.*, 1983, **28**, 170-172.
- 42 F. Pechar, *Cryst. Res. Technol.*, 1987, **22**, 1041-1046.
- 43 R. H. Mitchell, P. C. Burns, *Can. Mineral.*, 2001, **39**, 769-777.
